# Supplementary material for: Targeted Deep Resequencing Identifies Coding Variants in the PEAR1 Gene That Play a Role in Platelet Aggregation
Source: PubMed Central journal article supplement (PMC3660448; doi:10.1371/journal.pone.0064179), 2013-05-21
Supplement: pone.0064179.s001.pdf [file pone.0064179.s001.pdf]

## Supplementary information

### Targeted deep re-sequencing identifies coding variants in the *PEAR1* gene that play a role in platelet aggregation

**Supplementary table S1.** Single SNP association test p-values for all 235 sequenced variants including PEAR1 region (chr1: 156,863,269-156,886,226) found in African American (AA) and European American samples (EA)

| BP(hg19)  | rsID      | Ref | Alt | Function   | MAF  | AA                   | EA   |                      |
|-----------|-----------|-----|-----|------------|------|----------------------|------|----------------------|
|           |           |     |     |            |      | P-value <sup>a</sup> | MAF  | P-value <sup>a</sup> |
| 156863190 | 3118645   | G   | T   | intergenic | 0.30 | 0.8772               | 0.20 | 0.1960               |
| 156863204 | 2935227   | G   | T   | intergenic | 0.46 | 0.2157               | 0.19 | 0.0928               |
| 156863532 | 4661071   | T   | C   | utr-5      | 0.09 | 0.0703               | 0.00 | NA                   |
| 156863617 | 4661072   | G   | T   | utr-5      | 0.20 | 0.9172               | 0.16 | 0.0232               |
| 156863967 | 0         | A   | G   | intron     | 0.01 | 1.0000               | 0.00 | NA                   |
| 156864115 | 78616846  | C   | T   | intron     | 0.03 | 0.5988               | 0.00 | NA                   |
| 156864195 | 114762366 | T   | C   | intron     | 0.07 | NA                   | 0.00 | NA                   |
| 156864301 | 76164767  | T   | C   | intron     | 0.05 | 1.0000               | 0.00 | NA                   |
| 156864441 | 115134729 | C   | T   | intron     | 0.14 | NA                   | 0.00 | NA                   |
| 156864544 | 142135020 | G   | C   | intron     | 0.00 | NA                   | 0.01 | 0.4898               |
| 156864616 | 998459    | G   | C   | intron     | 0.16 | 0.5580               | 0.16 | 0.0232               |
| 156864688 | 146694129 | C   | T   | intron     | 0.01 | 1.0000               | 0.00 | NA                   |
| 156864794 | 80342528  | C   | A   | intron     | 0.07 | NA                   | 0.00 | NA                   |
| 156864856 | 0         | G   | A   | intron     | 0.01 | 1.0000               | 0.01 | 0.4565               |
| 156864869 | 74116905  | C   | T   | intron     | 0.03 | 0.1078               | 0.00 | NA                   |
| 156865563 | 77518602  | G   | A   | intron     | 0.03 | 0.2333               | 0.00 | NA                   |
| 156865716 | 140869102 | T   | C   | intron     | 0.01 | 1.0000               | 0.00 | NA                   |
| 156865924 | 74116906  | C   | T   | intron     | 0.03 | 0.2326               | 0.00 | NA                   |
| 156865939 | 74116907  | C   | T   | intron     | 0.03 | 0.2326               | 0.00 | NA                   |
| 156866310 | 0         | G   | A   | intron     | 0.02 | 0.4400               | 0.00 | NA                   |
| 156866692 | 0         | C   | T   | intron     | 0.01 | 0.4634               | 0.00 | NA                   |
| 156867098 | 0         | G   | T   | intron     | 0.00 | NA                   | 0.01 | 1.0000               |
| 156867237 | 60998468  | C   | T   | intron     | 0.03 | 0.2341               | 0.00 | NA                   |
| 156867286 | 148591218 | T   | C   | intron     | 0.06 | NA                   | 0.00 | NA                   |
| 156867327 | 72698679  | T   | C   | intron     | 0.11 | 0.2897               | 0.17 | 0.0391               |
| 156867409 | 141974181 | C   | T   | intron     | 0.05 | 1.0000               | 0.00 | NA                   |
| 156867515 | 0         | G   | C   | intron     | 0.00 | NA                   | 0.01 | 1.0000               |
| 156867789 | 114555158 | G   | A   | intron     | 0.06 | NA                   | 0.00 | NA                   |
| 156867816 | 115123600 | A   | C   | intron     | 0.00 | 0.0177               | 0.00 | NA                   |
| 156867984 | 6685635   | C   | T   | intron     | 0.11 | 0.0867               | 0.16 | 0.0232               |
| 156867990 | 2182760   | G   | A   | intron     | 0.08 | 0.2848               | 0.09 | 0.0565               |
| 156868254 | 4147300   | C   | A   | intron     | 0.40 | 0.5404               | 0.24 | 0.3124               |
| 156868255 | 4147301   | C   | G   | intron     | 0.40 | 0.5404               | 0.25 | 0.3119               |
| 156868693 | 0         | A   | T   | intron     | 0.00 | NA                   | 0.01 | 0.4667               |

|                  |                 |          |          |               |             |               |             |               |
|------------------|-----------------|----------|----------|---------------|-------------|---------------|-------------|---------------|
| 156868848        | 12407092        | T        | C        | intron        | 0.12        | 0.1411        | 0.17        | 0.0125        |
| 156868891        | 0               | G        | C        | intron        | 0.01        | 1.0000        | 0.00        | NA            |
| 156869047        | 12566888        | G        | T        | intron        | 0.48        | 0.0196        | 0.09        | 0.0616        |
| 156869099        | 149115055       | C        | T        | intron        | 0.01        | 0.4889        | 0.00        | NA            |
| 156869232        | 142243219       | G        | A        | intron        | 0.01        | 1.0000        | 0.00        | NA            |
| 156869237        | 56303495        | C        | T        | intron        | 0.15        | NA            | 0.15        | 0.0974        |
| 156869432        | 56106044        | A        | G        | intron        | 0.17        | 0.0769        | 0.16        | 0.0232        |
| 156869630        | 12086222        | G        | C        | intron        | 0.30        | 0.0223        | 0.16        | 0.0232        |
| 156869637        | 0               | G        | A        | intron        | 0.01        | 0.4889        | 0.00        | NA            |
| <b>156869714</b> | <b>12041331</b> | <b>G</b> | <b>A</b> | <b>intron</b> | <b>0.29</b> | <b>0.0004</b> | <b>0.09</b> | <b>0.0565</b> |
| 156870078        | 141619120       | G        | A        | intron        | 0.00        | NA            | 0.13        | 0.1647        |
| 156870615        | 943549          | G        | A        | intron        | 0.24        | 0.0495        | 0.26        | 0.5415        |
| 156870769        | 58581379        | T        | G        | intron        | 0.10        | 0.0913        | 0.00        | NA            |
| 156871186        | 0               | G        | C        | intron        | 0.01        | 1.0000        | 0.00        | NA            |
| 156871296        | 11810069        | C        | G        | intron        | 0.11        | 0.1941        | 0.00        | NA            |
| 156871318        | 6671171         | G        | A        | intron        | 0.17        | 0.8474        | 0.18        | 0.0294        |
| 156871995        | 75699653        | C        | T        | intron        | 0.00        | NA            | 0.01        | 0.4651        |
| 156872149        | 2768744         | G        | A        | intron        | 0.27        | 0.0679        | 0.25        | 0.4120        |
| 156872164        | 12081638        | G        | T        | intron        | 0.10        | NA            | 0.00        | NA            |
| 156872338        | 4661073         | C        | G        | intron        | 0.04        | 0.2317        | 0.00        | NA            |
| 156872589        | 0               | A        | G        | intron        | 0.01        | 0.4884        | 0.00        | NA            |
| 156872711        | 144019311       | T        | A        | intron        | 0.00        | NA            | 0.03        | 1.0000        |
| 156872767        | 2768745         | T        | C        | intron        | 0.08        | NA            | 0.38        | 0.9996        |
| 156872786        | 0               | G        | A        | intron        | 0.01        | 0.4737        | 0.00        | NA            |
| 156872895        | 150532926       | T        | G        | intron        | 0.00        | NA            | 0.01        | 1.0000        |
| 156873143        | 56385313        | G        | A        | intron        | 0.03        | 0.2333        | 0.00        | NA            |
| 156873295        | 78659507        | G        | A        | intron        | 0.09        | NA            | 0.00        | NA            |
| 156873319        | 72698684        | T        | C        | intron        | 0.00        | NA            | 0.01        | 0.4894        |
| 156873435        | 145662369       | G        | T        | intron        | 0.01        | 0.4872        | 0.02        | 1.0000        |
| 156873454        | 0               | C        | T        | intron        | 0.00        | NA            | 0.01        | 1.0000        |
| 156873463        | 11264579        | T        | C        | intron        | 0.37        | 0.1833        | 0.26        | 0.9105        |
| 156873631        | 0               | C        | T        | intron        | 0.01        | 1.0000        | 0.00        | NA            |
| 156873666        | 58132897        | C        | T        | intron        | 0.10        | NA            | 0.00        | NA            |
| 156873702        | 0               | T        | A        | intron        | 0.01        | 0.4706        | 0.00        | NA            |
| 156873727        | 12407843        | G        | A        | synonymous    | 0.15        | 0.6514        | 0.16        | 0.0387        |
| 156874421        | 41267433        | C        | G        | intron        | 0.15        | 0.5964        | 0.15        | 0.0608        |
| 156874765        | 0               | G        | A        | intron        | 0.01        | 1.0000        | 0.01        | 1.0000        |
| 156874842        | 114175834       | C        | T        | intron        | 0.01        | 0.4800        | 0.00        | NA            |
| 156874875        | 0               | G        | A        | intron        | 0.04        | 1.0000        | 0.00        | NA            |
| 156874882        | 6684500         | G        | T        | intron        | 0.03        | 0.0972        | 0.00        | NA            |
| 156874911        | 73006629        | T        | G        | intron        | 0.09        | NA            | 0.00        | NA            |
| 156874993        | 12048392        | C        | T        | intron        | 0.03        | 1.0000        | 0.04        | 1.0000        |
| 156875016        | 0               | A        | T        | intron        | 0.01        | 1.0000        | 0.00        | NA            |
| 156875037        | 6676171         | T        | G        | intron        | 0.39        | 0.4670        | 0.23        | 0.4106        |
| 156875092        | 4661074         | G        | A        | intron        | 0.25        | 0.1388        | 0.24        | 0.2467        |

|           |           |   |   |            |      |        |      |        |
|-----------|-----------|---|---|------------|------|--------|------|--------|
| 156875097 | 4661075   | G | A | intron     | 0.34 | 0.1473 | 0.23 | 0.3529 |
| 156875107 | 2644590   | C | A | intron     | 0.25 | 0.0642 | 0.23 | 0.3529 |
| 156875126 | 144471706 | C | T | missense   | 0.01 | 1.0000 | 0.00 | NA     |
| 156875154 | 0         | C | T | missense   | 0.03 | 1.0000 | 0.00 | NA     |
| 156875243 | 78814277  | G | C | intron     | 0.00 | 1.0000 | 0.00 | NA     |
| 156875360 | 114890085 | G | A | intron     | 0.05 | 1.0000 | 0.00 | NA     |
| 156875377 | 2644591   | G | C | intron     | 0.17 | 0.0614 | 0.03 | 0.2358 |
| 156875482 | 116086124 | C | T | intron     | 0.01 | 0.4706 | 0.05 | 0.6687 |
| 156875718 | 138955045 | C | T | intron     | 0.02 | 1.0000 | 0.00 | NA     |
| 156875764 | 2644592   | G | A | intron     | 0.34 | 0.0494 | 0.18 | 0.2474 |
| 156875935 | 41267435  | T | C | intron     | 0.34 | 0.9282 | 0.15 | 0.0689 |
| 156875975 | 76709785  | T | C | intron     | 0.20 | NA     | 0.00 | NA     |
| 156875985 | 2644593   | G | A | intron     | 0.08 | NA     | 0.00 | NA     |
| 156876206 | 6688345   | G | A | intron     | 0.34 | 0.7434 | 0.14 | 0.0350 |
| 156876221 | 6688349   | G | A | intron     | 0.34 | 0.8153 | 0.14 | 0.0350 |
| 156876237 | 6664765   | C | T | intron     | 0.34 | 0.9301 | 0.14 | 0.0350 |
| 156876260 | 6664770   | C | T | intron     | 0.34 | 0.8732 | 0.14 | 0.0350 |
| 156876274 | 0         | G | A | intron     | 0.02 | 0.4894 | 0.00 | NA     |
| 156876339 | 146185126 | G | C | intron     | 0.01 | 1.0000 | 0.03 | 0.6020 |
| 156876373 | 6677442   | A | G | intron     | 0.36 | 0.8952 | 0.15 | 0.0298 |
| 156876690 | 0         | C | T | intron     | 0.00 | NA     | 0.01 | 1.0000 |
| 156876729 | 735953    | T | C | intron     | 0.35 | 0.9628 | 0.14 | 0.0397 |
| 156876877 | 735954    | G | A | intron     | 0.03 | 0.2396 | 0.03 | 0.2353 |
| 156876906 | 12401524  | C | A | intron     | 0.30 | 0.5713 | 0.14 | 0.0597 |
| 156877110 | 61813831  | A | G | intron     | 0.03 | 0.2396 | 0.01 | 1.0000 |
| 156877237 | 115047003 | C | T | intron     | 0.11 | NA     | 0.00 | NA     |
| 156877240 | 0         | G | A | intron     | 0.01 | 1.0000 | 0.01 | 1.0000 |
| 156877249 | 6680819   | A | G | intron     | 0.23 | 0.7026 | 0.16 | 0.0948 |
| 156877457 | 1952294   | T | C | missense   | 0.08 | NA     | 0.00 | NA     |
| 156877477 | 147932853 | C | G | synonymous | 0.01 | 1.0000 | 0.00 | NA     |
| 156877581 | 0         | G | C | intron     | 0.01 | 1.0000 | 0.00 | NA     |
| 156877609 | 0         | G | A | intron     | 0.01 | 0.4800 | 0.00 | NA     |
| 156877655 | 0         | C | T | intron     | 0.01 | 1.0000 | 0.00 | NA     |
| 156877782 | 145275734 | G | T | missense   | 0.01 | 1.0000 | 0.00 | NA     |
| 156877797 | 77235035  | C | A | synonymous | 0.14 | 0.7973 | 0.12 | 0.0593 |
| 156877859 | 0         | C | A | intron     | 0.01 | 0.4792 | 0.00 | NA     |
| 156878039 | 141108373 | C | T | missense   | 0.01 | 1.0000 | 0.00 | NA     |
| 156878044 | 147639000 | G | A | missense   | 0.01 | 1.0000 | 0.02 | 1.0000 |
| 156878122 | 0         | C | A | missense   | 0.00 | NA     | 0.01 | 1.0000 |
| 156878420 | 4661076   | G | A | intron     | 0.02 | 1.0000 | 0.04 | 1.0000 |
| 156878421 | 4661011   | C | T | intron     | 0.02 | 1.0000 | 0.04 | 1.0000 |
| 156878435 | 11800463  | C | T | intron     | 0.25 | 0.9176 | 0.16 | 0.0808 |
| 156878473 | 77795865  | C | T | missense   | 0.01 | 0.4706 | 0.04 | 0.6105 |
| 156878531 | 11264580  | T | C | synonymous | 0.25 | 0.9176 | 0.16 | 0.0500 |
| 156878737 | 6671392   | T | C | synonymous | 0.25 | 0.9176 | 0.16 | 0.0500 |

|           |           |   |   |            |      |        |      |        |
|-----------|-----------|---|---|------------|------|--------|------|--------|
| 156878887 | 11810027  | G | A | intron     | 0.18 | 0.5570 | 0.14 | 0.0676 |
| 156879108 | 61457421  | A | T | intron     | 0.10 | NA     | 0.00 | NA     |
| 156879155 | 58905602  | C | T | intron     | 0.10 | NA     | 0.00 | NA     |
| 156879395 | 72698693  | C | T | intron     | 0.23 | 0.8784 | 0.16 | 0.1729 |
| 156879504 | 41273205  | A | G | intron     | 0.24 | 0.9917 | 0.13 | 0.1721 |
| 156879532 | 41273207  | C | T | intron     | 0.01 | 0.4651 | 0.01 | 1.0000 |
| 156879557 | 144560220 | A | G | missense   | 0.00 | NA     | 0.00 | NA     |
| 156879580 | 3737224   | C | T | synonymous | 0.16 | 0.5220 | 0.11 | 0.0675 |
| 156880153 | 143342590 | G | A | synonymous | 0.01 | 0.4898 | 0.00 | NA     |
| 156880190 | 41273213  | C | A | intron     | 0.00 | NA     | 0.02 | 1.0000 |
| 156880288 | 146834392 | C | G | intron     | 0.00 | NA     | 0.01 | 1.0000 |
| 156881162 | 0         | C | G | intron     | 0.00 | NA     | 0.01 | 1.0000 |
| 156881200 | 0         | T | C | intron     | 0.03 | 0.2515 | 0.00 | NA     |
| 156881222 | 149259370 | C | G | intron     | 0.04 | 1.0000 | 0.00 | NA     |
| 156881382 | 57883920  | A | G | intron     | 0.12 | NA     | 0.00 | NA     |
| 156881618 | 147227907 | T | C | intron     | 0.04 | 1.0000 | 0.00 | NA     |
| 156881959 | 41273215  | C | T | intron     | 0.14 | 0.4643 | 0.13 | 0.1718 |
| 156881979 | 75966765  | G | A | intron     | 0.03 | 1.0000 | 0.00 | NA     |
| 156882261 | 57731889  | C | T | intron     | 0.15 | 0.2527 | 0.07 | 0.3324 |
| 156882471 | 73006643  | C | A | intron     | 0.06 | NA     | 0.00 | NA     |
| 156882590 | 75198597  | G | A | synonymous | 0.01 | 1.0000 | 0.00 | NA     |
| 156882757 | 41299597  | C | G | missense   | 0.00 | NA     | 0.01 | 1.0000 |
| 156882791 | 12059218  | C | T | intron     | 0.06 | NA     | 0.00 | NA     |
| 156882853 | 76032315  | G | C | intron     | 0.07 | NA     | 0.00 | NA     |
| 156882950 | 61813832  | C | T | intron     | 0.01 | 1.0000 | 0.03 | 0.2359 |
| 156882996 | 822441    | G | C | synonymous | 0.41 | 0.6435 | 0.16 | 0.5470 |
| 156883029 | 113502219 | C | T | synonymous | 0.02 | 0.4906 | 0.00 | NA     |
| 156883084 | 0         | G | C | intron     | 0.01 | 0.4706 | 0.00 | NA     |
| 156883162 | 0         | T | G | intron     | 0.01 | 0.4894 | 0.00 | NA     |
| 156883215 | 822442    | C | A | missense   | 0.24 | 0.4557 | 0.15 | 0.1241 |
| 156883242 | 55864969  | G | A | synonymous | 0.01 | 0.4800 | 0.02 | 0.2358 |
| 156883263 | 56393520  | G | T | synonymous | 0.14 | NA     | 0.00 | NA     |
| 156883346 | 0         | C | T | intron     | 0.04 | 0.6105 | 0.00 | NA     |
| 156883493 | 11264581  | G | A | missense   | 0.07 | 0.2159 | 0.18 | 0.5944 |
| 156883546 | 12137505  | A | G | missense   | 0.27 | 0.5536 | 0.38 | 0.8253 |
| 156883547 | 78770410  | A | G | missense   | 0.03 | 0.0836 | 0.00 | NA     |
| 156883593 | 112488283 | G | C | intron     | 0.02 | 1.0000 | 0.00 | NA     |
| 156883617 | 61813833  | G | A | intron     | 0.04 | 0.1127 | 0.03 | 0.2364 |
| 156883625 | 78827480  | T | C | intron     | 0.01 | 1.0000 | 0.00 | NA     |
| 156883891 | 74116911  | T | C | synonymous | 0.01 | 1.0000 | 0.00 | NA     |
| 156884041 | 146640686 | C | T | intron     | 0.01 | 1.0000 | 0.00 | NA     |
| 156884050 | 0         | G | A | intron     | 0.00 | NA     | 0.01 | 1.0000 |
| 156884103 | 703156    | T | A | intron     | 0.50 | 0.2256 | 0.24 | 0.0163 |
| 156884365 | 749256    | T | C | intron     | 0.08 | 0.3817 | 0.25 | 0.7544 |

|           |           |   |   |            |      |        |      |        |
|-----------|-----------|---|---|------------|------|--------|------|--------|
| 156884372 | 75034235  | G | A | intron     | 0.01 | 1.0000 | 0.00 | NA     |
| 156884399 | 114364739 | G | C | intron     | 0.00 | NA     | 0.01 | 1.0000 |
| 156884486 | 114896181 | C | A | missense   | 0.01 | 0.4490 | 0.00 | NA     |
| 156884487 | 0         | C | T | missense   | 0.01 | 1.0000 | 0.00 | NA     |
| 156884584 | 56260937  | C | T | synonymous | 0.15 | 0.1366 | 0.25 | 0.0108 |
| 156884714 | 148183284 | G | A | utr-3      | 0.06 | NA     | 0.00 | NA     |
| 156884759 | 55739780  | T | C | utr-3      | 0.09 | 0.0787 | 0.00 | NA     |
| 156884958 | 113956837 | T | C | utr-3      | 0.07 | NA     | 0.00 | NA     |
| 156885010 | 0         | A | C | utr-3      | 0.01 | 0.4706 | 0.00 | NA     |
| 156885070 | 0         | C | A | utr-3      | 0.01 | 0.4706 | 0.00 | NA     |
| 156885156 | 56955334  | T | C | utr-3      | 0.03 | 0.0972 | 0.00 | NA     |
| 156885255 | 41273217  | G | A | utr-3      | 0.02 | 0.2065 | 0.02 | 0.2048 |
| 156885400 | 0         | C | T | utr-3      | 0.01 | 1.0000 | 0.00 | NA     |
| 156885491 | 4661012   | T | G | utr-3      | 0.30 | 0.0170 | 0.32 | 0.0169 |
| 156885699 | 0         | T | G | utr-3      | 0.01 | 0.4706 | 0.00 | NA     |
| 156885767 | 12139641  | A | G | utr-3      | 0.13 | 0.2786 | 0.25 | 0.0294 |
| 156885851 | 0         | A | C | utr-3      | 0.01 | 0.4800 | 0.00 | NA     |
| 156885929 | 11264582  | A | G | utr-3      | 0.07 | NA     | 0.00 | NA     |
| 156886068 | 0         | T | C | utr-3      | 0.01 | 0.4600 | 0.00 | NA     |
| 156886308 | 0         | A | G | intergenic | 0.01 | 0.4889 | 0.00 | NA     |
| 156886354 | 115224276 | G | A | intergenic | 0.01 | 0.4884 | 0.00 | NA     |
| 156886582 | 143644805 | G | T | intergenic | 0.01 | 1.0000 | 0.00 | NA     |
| 156886633 | 147185059 | A | G | intergenic | 0.07 | NA     | 0.00 | NA     |
| 156886777 | 61546108  | G | A | intergenic | 0.14 | 0.2062 | 0.23 | 0.0168 |
| 156887101 | 2768746   | A | G | intergenic | 0.46 | 0.0586 | 0.25 | 0.0099 |
| 156887164 | 2644595   | C | T | intergenic | 0.05 | NA     | 0.00 | NA     |
| 156887172 | 149312817 | G | A | intergenic | 0.06 | NA     | 0.00 | NA     |
| 156887224 | 0         | A | G | intergenic | 0.01 | 0.4800 | 0.00 | NA     |
| 156887312 | 111806293 | T | C | intergenic | 0.07 | NA     | 0.00 | NA     |
| 156887425 | 0         | T | C | intergenic | 0.01 | 0.4490 | 0.00 | NA     |
| 156887497 | 148728990 | C | T | intergenic | 0.13 | NA     | 0.00 | NA     |
| 156887500 | 0         | T | C | intergenic | 0.01 | 0.4468 | 0.00 | NA     |
| 156887580 | 2986717   | C | T | intergenic | 0.46 | 0.0534 | 0.24 | 0.0110 |
| 156887970 | 0         | G | A | intergenic | 0.00 | NA     | 0.01 | 0.4898 |
| 156888030 | 77024634  | G | A | intergenic | 0.07 | 0.1237 | 0.00 | NA     |
| 156888145 | 0         | C | G | intergenic | 0.00 | NA     | 0.01 | 1.0000 |
| 156888274 | 0         | A | T | intergenic | 0.01 | 0.4694 | 0.00 | NA     |
| 156888674 | 113179644 | C | T | intergenic | 0.06 | NA     | 0.00 | NA     |
| 156888690 | 113970934 | A | G | intergenic | 0.14 | 0.1846 | 0.25 | 0.0126 |
| 156888739 | 0         | A | C | intergenic | 0.00 | NA     | 0.01 | 1.0000 |
| 156889058 | 114535285 | C | G | intergenic | 0.01 | 0.4600 | 0.00 | NA     |
| 156889218 | 60465657  | T | C | intergenic | 0.08 | NA     | 0.00 | NA     |
| 156889352 | 0         | A | C | intergenic | 0.01 | 0.4706 | 0.00 | NA     |
| 156889398 | 0         | T | C | intergenic | 0.00 | NA     | 0.00 | NA     |
| 156889491 | 0         | G | A | intergenic | 0.01 | 0.4898 | 0.00 | NA     |
| 156889686 | 0         | G | A | intergenic | 0.01 | 0.4706 | 0.00 | NA     |

|           |           |   |   |            |      |        |      |        |
|-----------|-----------|---|---|------------|------|--------|------|--------|
| 156889930 | 0         | G | T | intergenic | 0.01 | 0.4898 | 0.00 | NA     |
| 156889961 | 0         | C | G | intergenic | 0.02 | 1.0000 | 0.00 | NA     |
| 156890110 | 142013683 | C | T | intergenic | 0.06 | NA     | 0.00 | NA     |
| 156890372 | 0         | C | A | intergenic | 0.02 | 0.2165 | 0.01 | 0.4906 |
| 156890394 | 0         | C | T | intergenic | 0.01 | 1.0000 | 0.00 | NA     |
| 156890501 | 141256165 | C | T | intergenic | 0.00 | NA     | 0.02 | 0.2262 |
| 156890672 | 41273221  | T | C | intergenic | 0.15 | 0.1366 | 0.24 | 0.0211 |
| 156890854 | 41273223  | C | G | intron     | 0.03 | 1.0000 | 0.06 | NA     |
| 156891004 | 0         | T | C | intron     | 0.03 | 1.0000 | 0.01 | 1.0000 |
| 156891005 | 0         | C | A | intron     | 0.03 | 1.0000 | 0.01 | 1.0000 |
| 156891138 | 115756800 | C | T | intron     | 0.02 | 0.4976 | 0.00 | NA     |
| 156891291 | 73006661  | G | A | intron     | 0.03 | 0.1836 | 0.00 | NA     |
| 156891554 | 74116913  | C | A | intron     | 0.04 | 0.3112 | 0.00 | NA     |
| 156891610 | 12143768  | G | A | intron     | 0.15 | NA     | 0.16 | NA     |
| 156891688 | 0         | G | C | intron     | 0.01 | 0.4348 | 0.00 | NA     |
| 156891712 | 0         | G | A | intron     | 0.00 | NA     | 0.01 | 1.0000 |
| 156891906 | 55820829  | G | A | intron     | 0.02 | 0.1758 | 0.03 | 0.6104 |
| 156892041 | 115092323 | G | A | intron     | 0.01 | 1.0000 | 0.00 | NA     |
| 156892068 | 0         | C | G | intron     | 0.01 | 0.4490 | 0.00 | NA     |
| 156892176 | 115390650 | A | G | intron     | 0.09 | NA     | 0.00 | NA     |
| 156892394 | 822436    | T | C | intron     | 0.42 | 0.1483 | 0.22 | 0.0295 |

a. Single marker association test p values using Fisher's Exact Test for rare variants (MAF  $\leq$  5%) and a logistic regression for common variants (MAF  $>$  5%).
